# Supplementary material for: White light emission from a mixture of pomegranate extract and carbon nanoparticles obtained from the extract
Source: Royal Society of Chemistry journal article supplement (doi:10.1039/c6tc00480f), 2016-01-01
Supplement: c6tc00480f1.pdf [file c6tc00480f1.pdf]

## **Supplementary Information**

### **White light emission from a mixture of pomegranate extract and carbon nanoparticles from the extract**

Vikram Singh and Ashok Kumar Mishra\*

---

Department of Chemistry, Indian Institute of Technology Madras

Chennai 600036, India

\*Corresponding author. Tel.: +91 44 22574207; fax: +91 44 22574202

E-mail address: [mishra@iitm.ac.in](mailto:mishra@iitm.ac.in)

## **Table of Contents**

### **Experimental Data**

|                                                                                  |   |
|----------------------------------------------------------------------------------|---|
| -Fig. S1. FTIR Spectrum of CNPs                                                  | 3 |
| -Fig. S2. Zeta potential of water soluble CNPs                                   | 4 |
| -Fig. S3. Hypothetically additive Fluorescence spectra and CIE chromaticity plot | 5 |
| -Fig. S4. Fluorescence spectra in various concentrations                         | 6 |
| -Fig. S5. White light emitting solution incorporated PVA film                    | 7 |
| -Fig. S6. Emissive colour response of WL solution                                | 8 |
| -Fig. S7. Emissive colour response of PVA film                                   | 9 |

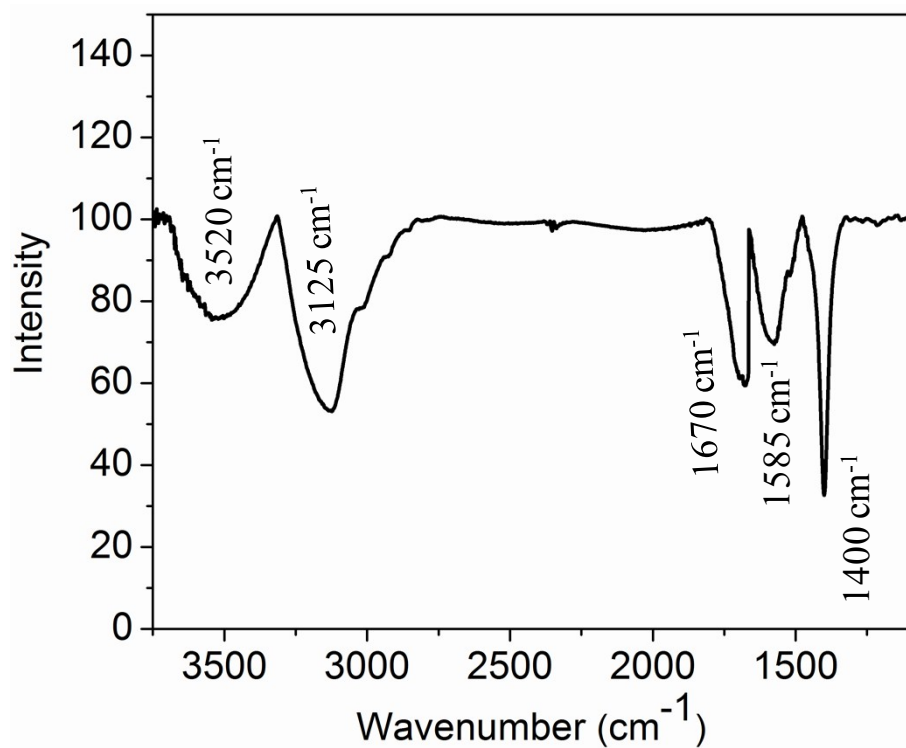

**Figure S1.** FTIR spectrum of CNPs

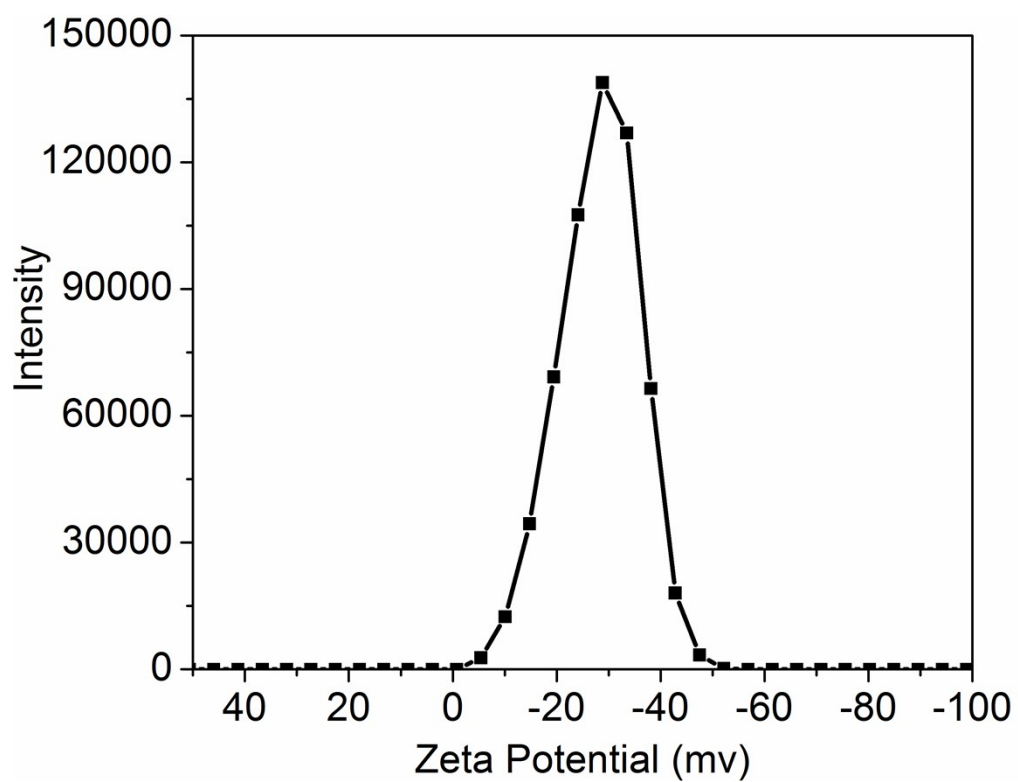

**Figure S2.** Zeta Potential of the CNPs in aqueous medium by using DLS

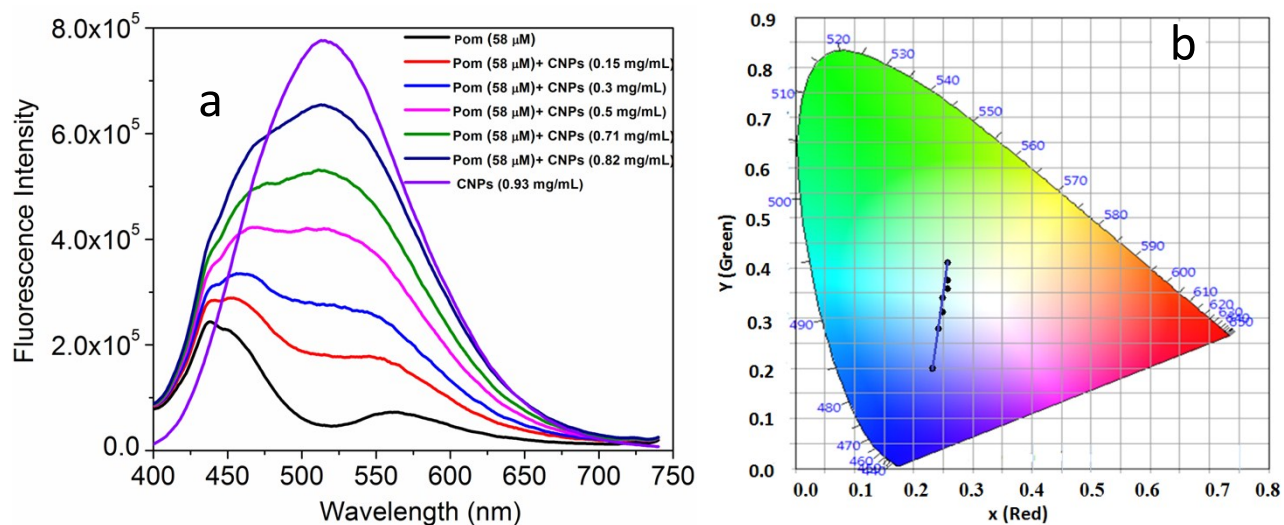

**Figure S3.** (a) Hypothetically additive fluorescence spectra of pom (58  $\mu\text{M}$ ) and CNPs (b) Chromaticity plot for the projected fluorescence emission spectra after addition of individual emissions of pom and CNPs at pH 1.2 [ $\lambda_{\text{exc}} = 380 \text{ nm}$ ]

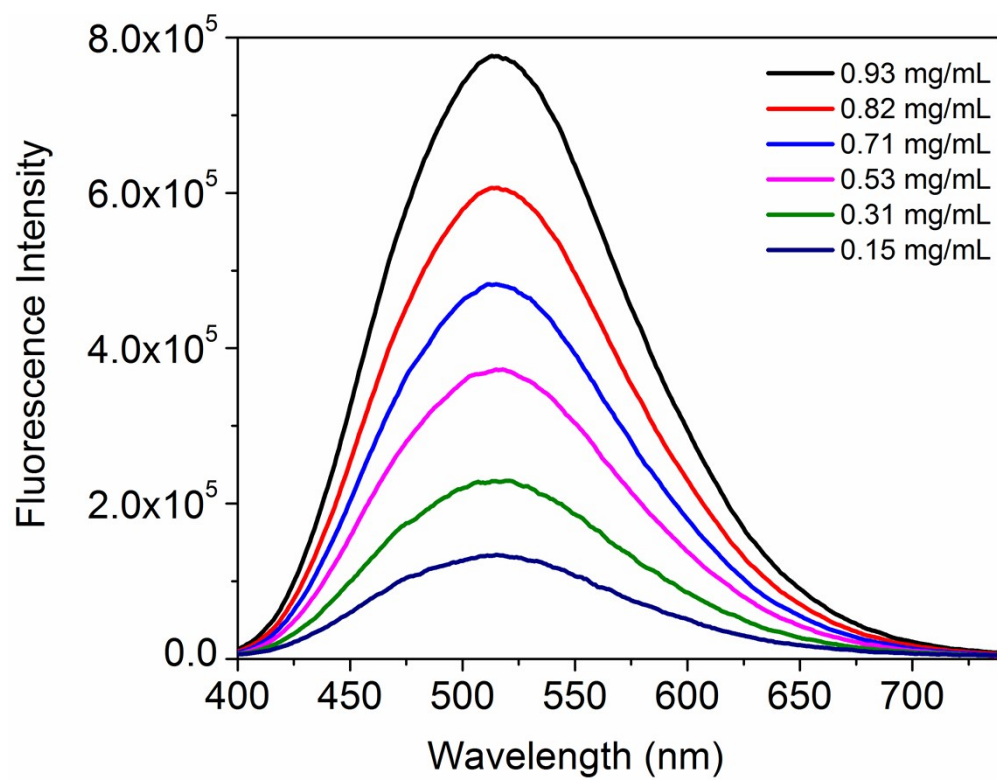

**Figure S4.** Fluorescence emission spectra of CNPs in various concentrations [ $\lambda_{\text{exc}}$  = 380 nm]

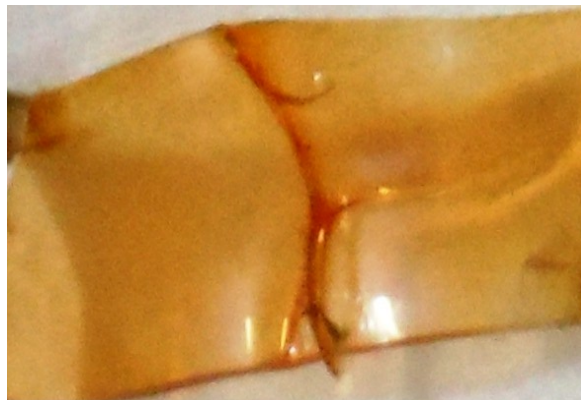

**Figure S5.** Colour of a ‘white light emitting solution’ incorporated PVA film under visible light [where, [cyan-3-glu] = 58  $\mu$ M and [CNPs] = 0.3 = mg/mL]

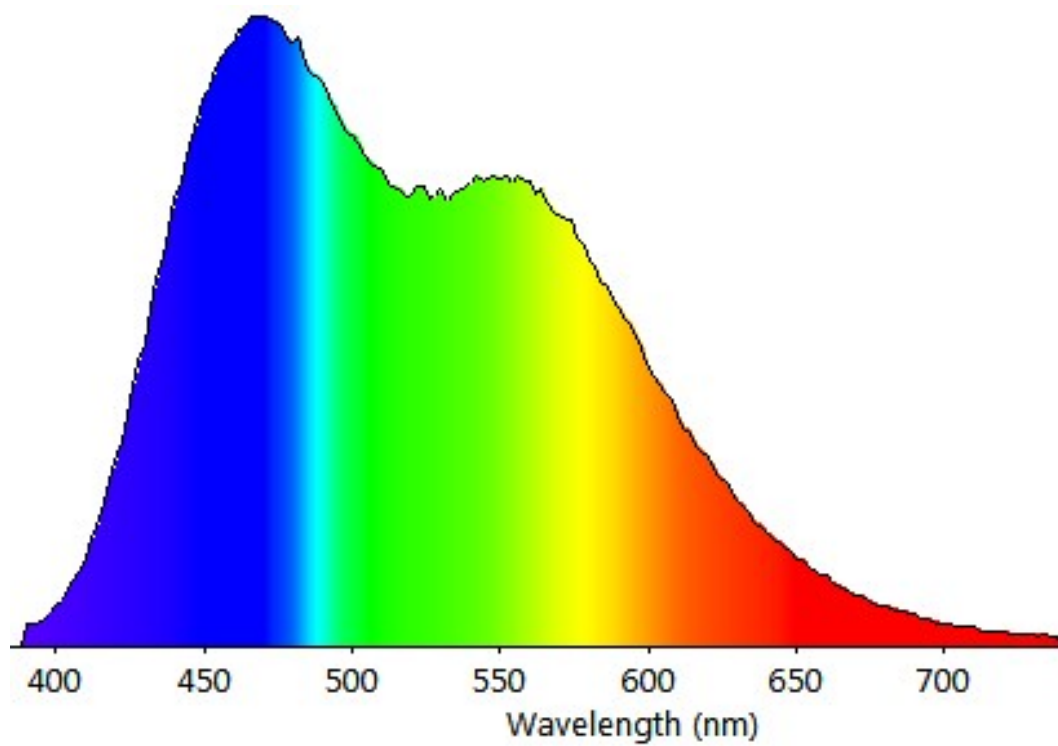

**Figure S6.** Emissive colour response of WLE in aqueous solution at pH 1.2 [ $\lambda_{\text{exc}} = 380 \text{ nm}$ ]

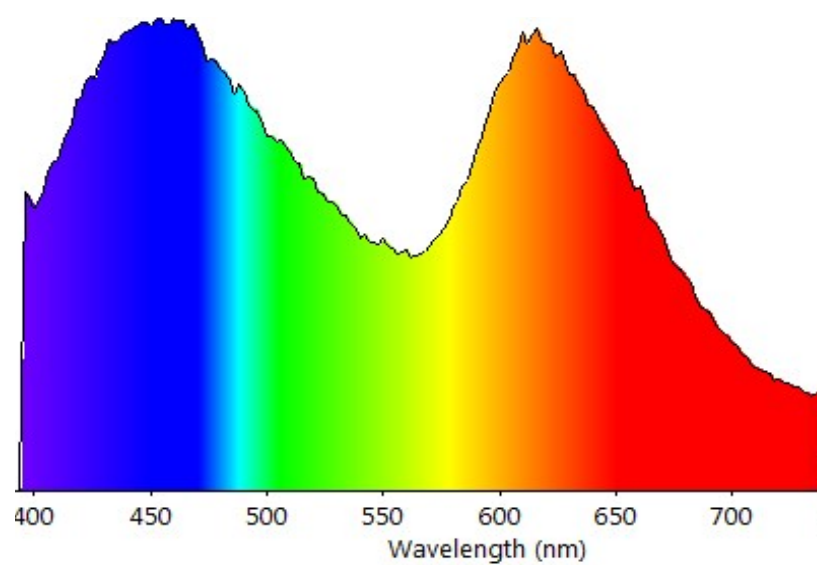

**Figure S7.** Emissive colour response of incorporated PVA film [ $\lambda_{\text{exc}} = 380 \text{ nm}$ ]
